# Supplementary material
Source: PubMed Central journal article supplement (PMC3478952)
Supplement: NIHMS408055-supplement-supplement.pdf [file NIHMS408055-supplement-supplement.pdf]

## Supporting information

### Mussel foot protein-1 (mcfp-1) interaction with titania surfaces

Dong Soo Hwang<sup>\*a†</sup>, Matthew J. Harrington<sup>b†</sup>, Qingye Lu<sup>c</sup>, Admir Masic<sup>b</sup>, Hongbo Zeng<sup>\*c</sup>, J. Herbert Waite<sup>\*d</sup>

<sup>a</sup>POSTECH Ocean Science and Technology Institute, Pohang University of Science and Technology, Pohang 790784

<sup>b</sup>Department of Biomaterials, Max Planck Institute for Colloids and Interfaces, 14424 Potsdam-Golm, Germany

<sup>c</sup>Department of Chemical Engineering, University of Alberta, Canada

<sup>d</sup>Materials Research Laboratory, University of California, Santa Barbara, California 93106

### Supporting Information Table of Contents

| Page | Content                                                                                                                    |
|------|----------------------------------------------------------------------------------------------------------------------------|
| 1    | Experimental materials and methods                                                                                         |
| 2    | <b>Figure S1.</b> AFM tapping mode image of a mica supports TiO <sub>2</sub> surface in dry                                |
| 3    | <b>Table S1.</b> Spectral assignments for dopa-TiO <sub>2</sub> resonance Raman peaks in comparison with similar complexes |
| 3    | Supplementary references                                                                                                   |

## Experimental materials and methods

### Mcfp-1 purification

Mcfp-1 was purified from frozen *Mytilus californinus* feet according to published procedures.<sup>[1]</sup> Purified mcfp-1 was treated with 1 mM EDTA in 5% acetic acid and polished with C8 reverse phase column to prevent residual metal ion contamination. Sample purity was assessed by acid urea polyacrylamide gel electrophoresis, amino acid analysis, and MALDI-TOF mass spectrometry. The DOPA in purified mcfp-1 was ~13 mol% by amino acid analysis after a 1h hydrolysis in 6N HCl at 158 °C. Purified samples were freeze-dried and resuspended in a solution of 0.1 M acetic acid, pH 3.0 and thereafter divided into convenient aliquot volumes for storage in aluminum foil-covered vials at -80 °C prior to testing. Thin layer of TiO<sub>2</sub> (~15 nm) were deposited onto mica by e-beam evaporation (PVD-75, Kurt J. Lesker) at 0.05-0.1 nm/s with  $1.5 \times 10^{-5}$  Torr of O<sub>2</sub> and (2-8) × 10<sup>-6</sup> Torr of H<sub>2</sub>O. The root mean square (rms) roughness values of mica and TiO<sub>2</sub> determined by AFM (DI, Santa Barbara, CA, USA) with a AFM image (5 μm \* 5 μm) was about 0.16 and 0.8 nm, respectively.

### SFA experiment

The normal force-distance profiles and adhesion forces of the mcfp-1 were determined using a surface forces apparatus (SFA) in a configuration reported previously.<sup>[2]</sup> The smooth and chemically inert surfaces of mica were used as the substrate surfaces for depositing thin films of the protein used in the experiment. Two thin mica sheets (thickness 1-5 μm) were glued onto two cylindrical silica disks (radius  $R=2$  cm). For mcfp-1 coating on the surfaces (mica and mica supported TiO<sub>2</sub>), 100 μL of mcfp-1 solution (10 μg/mL) diluted in 0.1 M acetic acid (pH~3.0) was dropped onto one the surfaces, and the surfaces are incubated until protein adsorption reaches equilibrium (20 min); then the surfaces are washed more than five times with a buffer that is appropriate for the specific experiment. The thickness of adsorbed mcfp-1 film on the surfaces measured by hardwall distance was constant (8 ~10 nm). Since the mcfp-1 film thickness was less than the hydrodynamic diameter of mcfp-1 (~16 nm), we considered the mcfp-1 film as a monomolecular layers. Higher protein concentration (over ~10 μg/mL) or excessive incubation time with protein solution to surfaces (over ~20 min), generally lead to multi-layer deposition of protein and make the experimental results unreliable. One coated and one uncoated target surface (asymmetric configuration) were then mounted in the SFA chamber in a crossed-cylinder geometry, which roughly corresponds to a sphere of radius  $R$  approaching a flat surface based on the "Derjaguin approximation". The measured adhesion or "pull-off" force  $F_{ad}$  is related to the adhesion energy per unit area  $E_{ad}$  by  $E_{ad} = F_{ad}/1.5 \pi R$  (used in this study) for soft deformable surfaces with strong adhesive contact.<sup>[3]</sup> A constant rate of approach and separation (5~6 nm/sec) were used for each force run. The experiments were conducted at room temperature (20 °C).

### Resonance Raman Spectroscopy

Raman spectra were collected from the surface of samples with a confocal Raman microscope (alpha300; WITec) equipped with a Nikon objective (100X) and using a laser excitation wavelength of 532 nm. Spectra were acquired with a CCD camera (DV401-BV; Andor) behind a spectrometer (UHTS 300; WITec) with a spectral resolution of 3 cm<sup>-1</sup>. Samples were prepared by incubating protein on TiO<sub>2</sub> surfaces as described in the SFA experimental section. Protein solutions of pH3 and pH5 were incubated for ~20 min after which the surfaces were washed with their respective solutions and dried prior to measurement. Spectra from bare mica, TiO<sub>2</sub> coated mica, and protein incubated on a bare mica surface were acquired as controls. Protein coated samples were sensitive to burning by the laser beam; therefore, laser power was restricted to 10–20 mW and only short integration times of 0.3 s were used for all measurements. The ScanCtrlSpectroscopyPlus software (version 1.38, Witec) was used for measurement and data analysis. Each collected spectrum consisted of 100 accumulations of a 0.3 s integration time. For each sample, three spectra were collected from different regions and averaged. Averaged spectra were smoothed with a Savitzky-Golay smoothing filter. To observe the resonance peaks more clearly in spectra from protein coated samples, the combined mica/TiO<sub>2</sub> background spectra was subtracted.

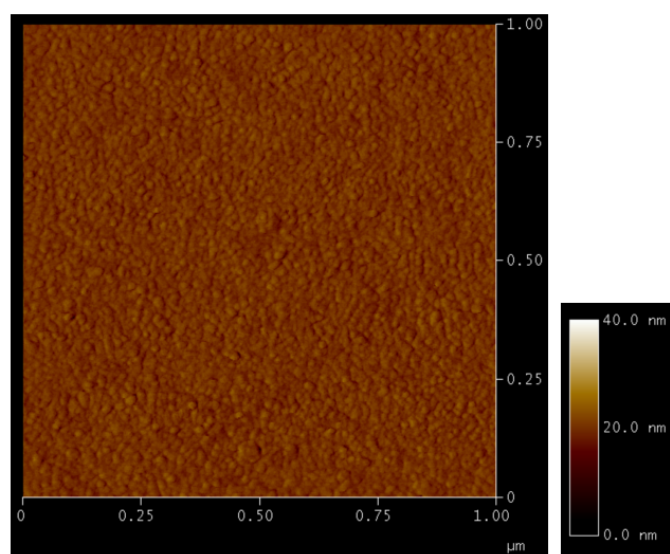

**Figure S1.** AFM tapping mode image of a mica supported  $\text{TiO}_2$  surface in dry.

| Mcfp-1<br>TiO <sub>2</sub> (pH3) | Mcfp-1<br>TiO <sub>2</sub> (pH5) | <sup>b</sup> Byssus<br>coating | <sup>c</sup> Mefp-1<br>Fe <sup>3+</sup> | <sup>d</sup> (NH <sub>4</sub> ) <sub>2</sub> [Ti(cat) <sub>3</sub> ]<br>•2H <sub>2</sub> O | <sup>d</sup> catechol-<br>anatase | <sup>e,f</sup> assignments |
|----------------------------------|----------------------------------|--------------------------------|-----------------------------------------|--------------------------------------------------------------------------------------------|-----------------------------------|----------------------------|
| 518                              | 536                              | 550                            | 531                                     | 505                                                                                        |                                   | δ,ν-chelate CT             |
| 594                              | 591                              | 605                            | 591                                     | 591                                                                                        |                                   | ν Me-O <sub>3</sub>        |
| 645                              | 639                              | 639                            | 638                                     | 646                                                                                        |                                   | ν Me-O <sub>4</sub>        |
| 836                              | 836                              | 828                            | 815                                     |                                                                                            |                                   | ring breathing             |
|                                  |                                  |                                | 1152                                    | 1153                                                                                       | 1155                              | δCH                        |
| 1274                             | 1271                             | 1271                           | 1274                                    | 1270                                                                                       | 1261                              | ν C-O                      |
| 1332                             | 1332                             | 1326                           | 1326                                    | 1338                                                                                       | 1329                              | ν CC                       |
| 1439                             | 1456                             | 1426                           | 1426                                    | 1475                                                                                       |                                   |                            |
| 1487                             | 1487                             | 1475                           | 1491                                    | 1490                                                                                       | 1483                              | ν CC + δCH                 |

Ref: <sup>a</sup>Present study <sup>b</sup>Harrington et al <sup>c</sup>Taylor et al <sup>d</sup>Lana-Villarreal et al <sup>e</sup>Michaud-Soret et al <sup>f</sup>Ohhrstroëm et al

**Table S1.** Spectral assignments for DOPA-TiO<sub>2</sub> resonance Raman peaks in comparison with similar complexes

### Supplementary references

1. Q. Lu, D. S. Hwang, Y. Liu, H. Zeng, *Biomaterials* **2012**, 33, 1903-11
2. a) C. A. Helm, W. Knoll, J. N. Israelachvili, *Proc Natl Acad Sci U S A* **2007**, 88, 8169-73; b) K. L. Johnson, K. Kendall, A. D. Roberts, *Proc. Royal Soc. London Series a-Math. and Physical Sci.* **1971**, 324, 301.
3. a) Q. Lin, D. Gourdon, C. Sun, N. Holten-Anderson, T. H. Anderson, J. H. Waite, J. N. Israelachvili, *Proc Natl Acad Sci U S A*, **2007**, 104, 3782-6; b) T. H. Anderson, J. Yu, A. Estrada, M. U. Hammer, J. H. Waite, J. N. Israelachvili, *Adv Func Mater*, **2010**, 20, 4196-4205.
4. M. J. Harrington, A. Masic, N. Holten-Anderson, J. H. Waite, P. Fratzl *Science* **2010**, 328, 216-20.
5. S. W. Taylor, B. D. Chase, M. H. Emptage, M. J. Nelson, J. H. Waite, *Inorg Chem* **1996**, 35, 7572-7.
6. T. Lana-Villarreal, A. Rodes, J. M. Perez, R. Gomez, *J Am Chem Soc* **2005**, 127, 12601-11.
7. I. Michaud-Soret, K. K. Anderson, L. Que Jr., J. Haavik, *Biochemistry* **1995**, 34, 5504-10.
8. L. Ohhrstroëm, I. Michaud-Soret, *J Am Chem Soc* **1996**, 118, 328304.
